# Supplementary material
Source: Royal Society of Chemistry journal article supplement (doi:10.1039/d6nj00139d)
Supplement: d6nj00139d1.pdf [file d6nj00139d1.pdf]

## Supporting information

### **Hierarchical holey reduced graphene oxide-carbon quantum dot hybrid conductive additive enabling high-rate and long-cycle LiFePO<sub>4</sub> cathodes**

Ben Liang<sup>a</sup>, Junhong Lu<sup>a</sup>, Yanlin Zhang<sup>a</sup>, Haoyang Jiang<sup>a</sup>, Meiling Ji<sup>a</sup>, Chunfeng Shi<sup>b,\*</sup>, Dafang He<sup>a,\*</sup>, and Guangyu He<sup>a,\*</sup>

<sup>a</sup> Key Laboratory of Advanced Catalytic Materials and Technology, Advanced Catalysis and Green Manufacturing Collaborative Innovation Center, Changzhou University, Changzhou 213164, Jiangsu Province, China.

<sup>b</sup> State Key Laboratory of Petroleum Molecular & Process Engineering, Sinopec Research Institute of Petroleum Processing, College Road 18, Haidian District, Beijing 100083, China.

**\*Corresponding Author:**

E-mail: dafanghe@cczu.edu.cn; hegy@cczu.edu.cn

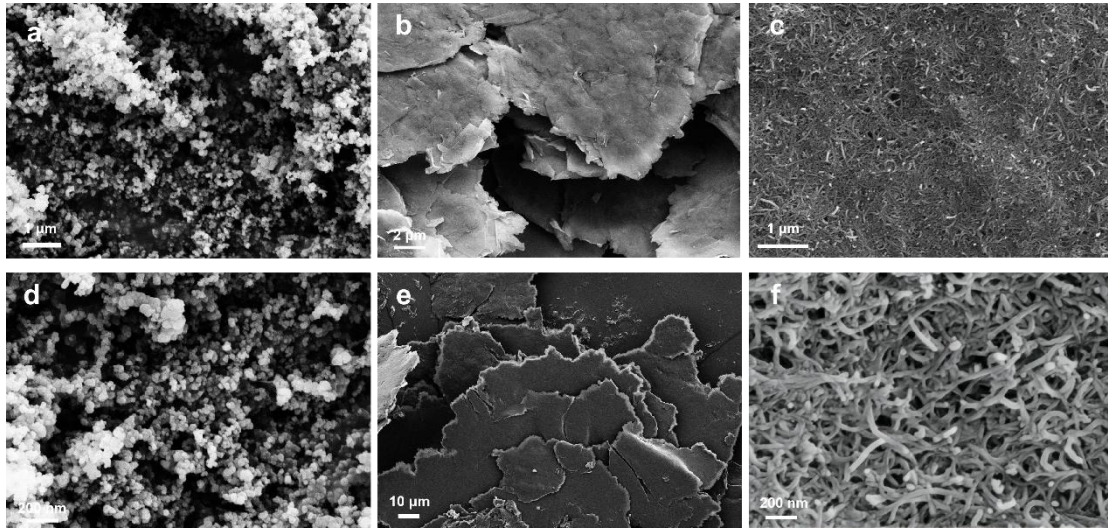

**Fig. S1.** (a-d) SEM images of SP; (b-e) GN; (c-f) CNT.

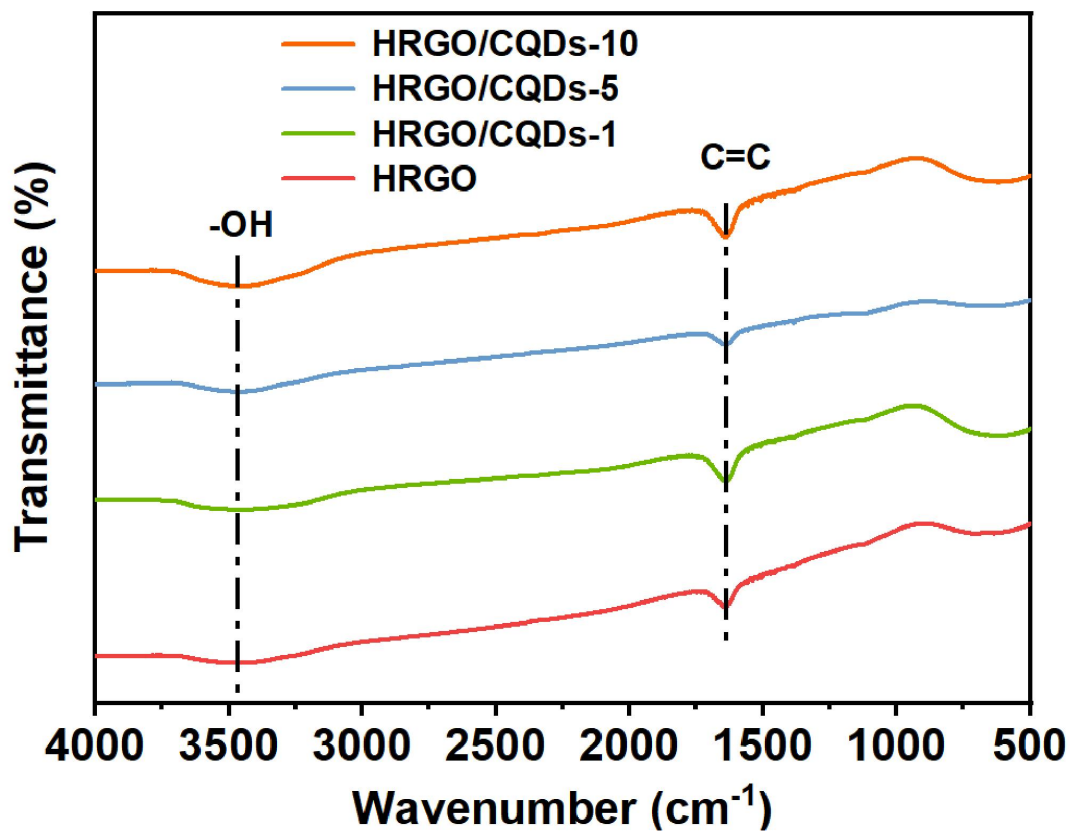

Fig. S2. FT-IR spectra of the pure HRGO/CQDs-1, HRGO/CQDs-5 and HRGO/CQDs-10.

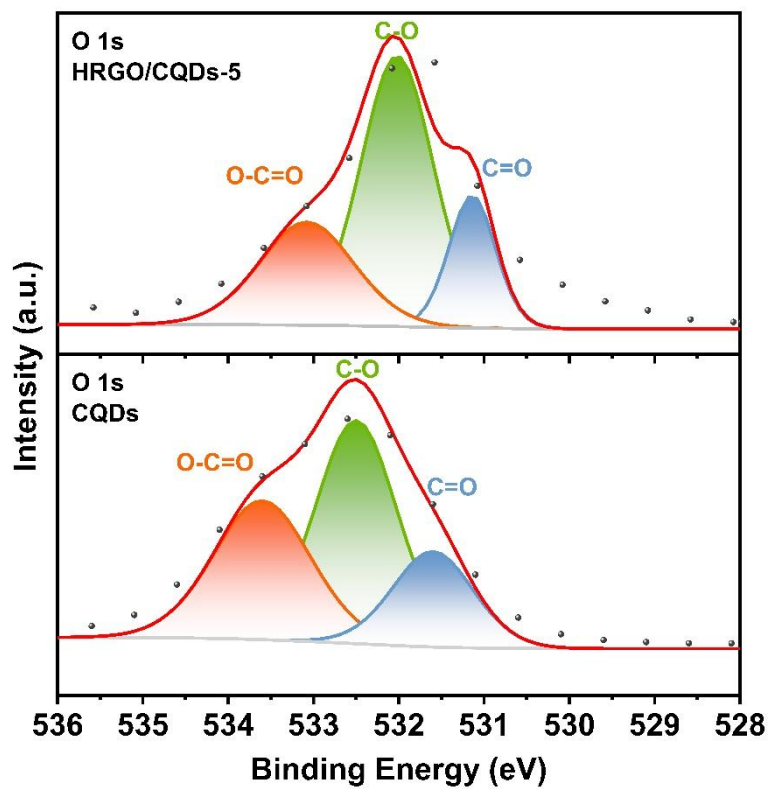

**Fig. S3.** High resolution XPS O 1s spectrum of the HRGO/CQDs-5 and CQDs.

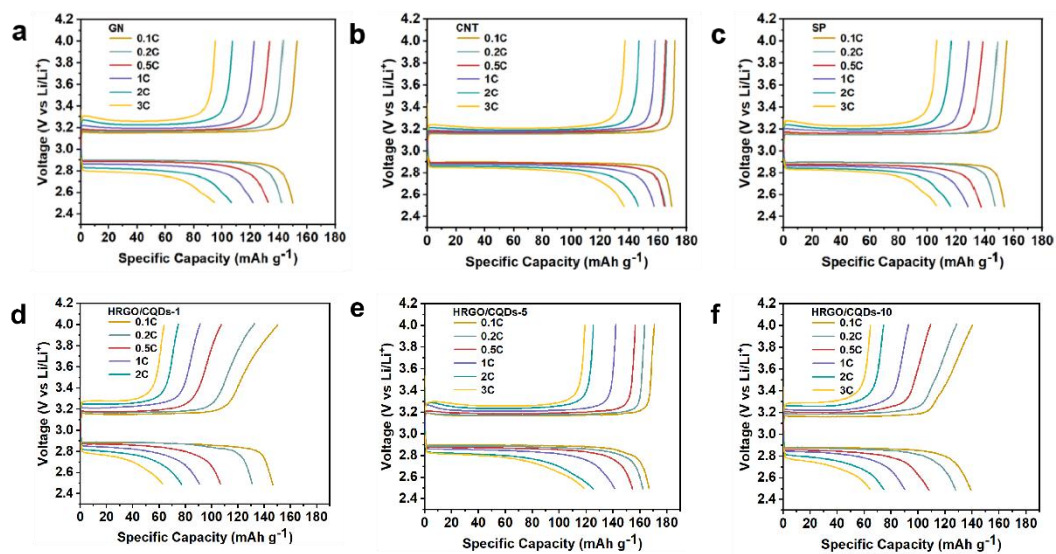

**Fig. S4.** (a) Typical galvanostatic charge-discharge curves of the GN and (b) CNT and (c) SP and (d) HRGO/CQDs-1 and (e) HRGO/CQDs-5 and (f) HRGO/CQDs-10 cathode at different rates.

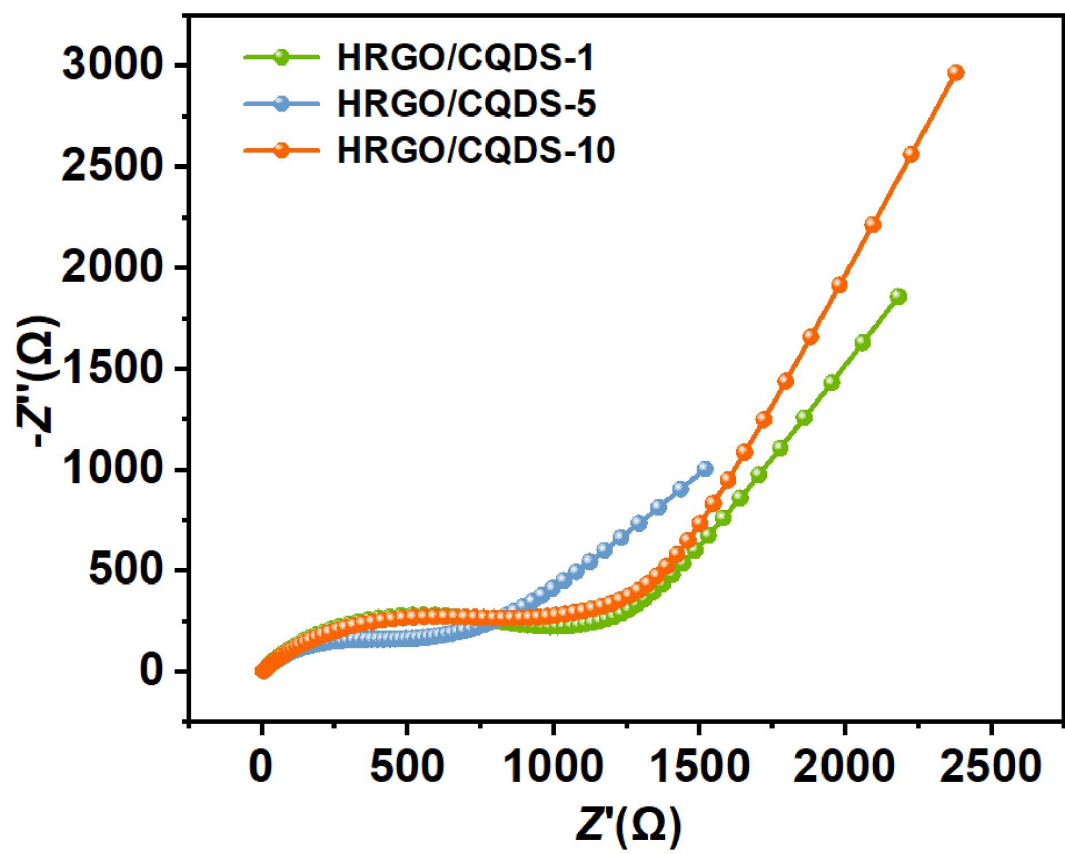

**Fig. S5.** Electrochemical impedance spectroscopy (EIS) of LiFePO<sub>4</sub> batteries based on the HRGO/CQDs-1, HRGO/CQDs-5 and HRGO/CQDs-10 conductive agent.

**Table. S1.** Resistivity and conductivity of different conductive agents

| Samples      | Resistivity ( $\Omega \cdot \text{cm}$ ) | conductivity ( $\text{S cm}^{-1}$ ) |
|--------------|------------------------------------------|-------------------------------------|
| HRGO/CQDs-1  | 0.045                                    | 22.015                              |
| HRGO/CQDs-5  | 0.023                                    | 43.203                              |
| HRGO/CQDs-10 | 0.032                                    | 30.506                              |

**Table. S2.** Performance comparison of the prepared conductive agent with reference materials in LiFePO<sub>4</sub> applications

| Cathode material       | Conductive agent | Additive | 1C Rate (mAh g <sup>-1</sup> ) | Refs      |
|------------------------|------------------|----------|--------------------------------|-----------|
| LiFePO <sub>4</sub> @C | 10%CNT-5         | 10%PVDF  | 129                            | [1]       |
| LiFePO <sub>4</sub>    | 10%rGO           | 10%PVDF  | 120                            | [2]       |
| LiFePO <sub>4</sub> @C | 10%CB-5          | 10%PVDF  | 120                            | [3]       |
| LiFePO <sub>4</sub>    | 10%KB            | 5%BC     | 137                            | [4]       |
| LiFePO <sub>4</sub>    | 2%HRGO/CQDs-5    | 3%PVDF   | 134                            | This work |

## References:

1. M. Chen, F.M. Liu, S.S. Chen, Y.J. Zhao, Y. Sun, C.S. Li, Z.Y. Yuan, X. Qian and R. Wan, In situ self-catalyzed formation of carbon nanotube wrapped and amorphous nanocarbon shell coated LiFePO<sub>4</sub> microclew for high-power lithium ion batteries, *Carbon.*, 2023, **203**, 661-670.
2. C. Juare-yescas, G. Ramos-Sánchez, I. González, Influence of reduced graphene oxides (rGO) at different reduction stages as conductive additive in Li-ion batteries, *Journal of Solid State Electrochemistry.*, 2018, **22**, 3225-3233.
3. T.F. Liu, L. Zhao, J.S. Zhu, B. Wang, C.F. Guo and D.L. Wang, The composite electrode of LiFePO<sub>4</sub> cathode materials modified with exfoliated graphene from expanded graphite for high power Li-ion batteries, *Journal of Materials Chemistry A.*, 2014, **2**, 2822-2829.
4. H.F. Zhu, Y.S. Xie, S.F. Zou, B. Na, R. Zeng and S. Zhang, Morphology control of free-standing LiFePO<sub>4</sub>-based composite membranes for advanced lithium-ion battery cathodes, *Energy Technology.*, 2022, **10**, 2101080.
